# Supplementary material
Source: publisher site journal article supplement (https://www.dovepress.com/article/594356)
Supplement: Supplementary file 1 [file 594356%20Supplementary%20Material.docx]

**
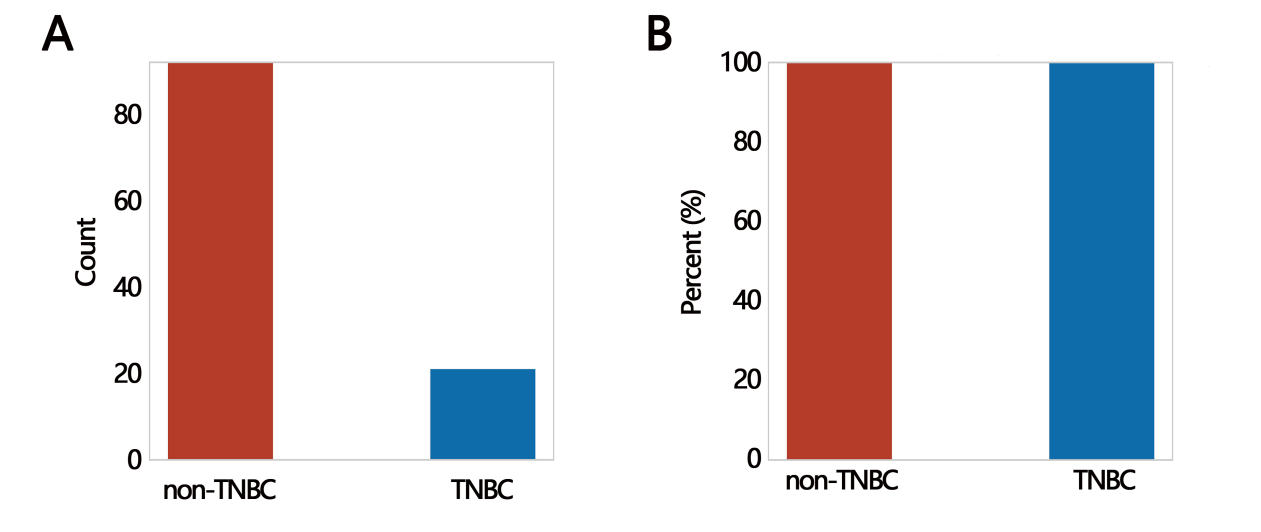
**

**Figure S1.** Distribution of TNBC in the training set before (A) and after (B) processed by borderline SMOTE.

Abbreviation: SMOTE, Synthetic minority over-sampling technique; TNBC, Triple-negative breast cancer.

**Table S1.** MRI scan parameters.

| **Sequence name** | **Conventional MRI** | | |  | **DCE-MRI** |  | **qMRI** | | |
| --- | --- | --- | --- | --- | --- | --- | --- | --- | --- |
| Axial T1WI | Axial Fat-Suppressed T2WI | DWI |  | Axial DCE |  | T1 Mapping (Pre- & 5-min Post-contrast) | T2 Mapping | |
| TR (ms)/TE(ms) | 6/ 2.46 | 4000 / 54 | 7400 / 42 |  | 3.89 / 2.46 |  | 4.95 / 1.75 | 1890 / 10.5, 21, 31.5, 42, 52.5, 63 | |
| Slice thickness/Gap (mm) | 4 / 0.4 | 4 / 0.4 | 4 / 0.4 |  | 1.4 / 0.23 |  | 2 / 0.4 | 4 / 0.8 | |
| FOV (mm2) | 360 × 360 | 340 × 340 | 380 × 306.28 |  | 400 × 325.2 |  | 300 × 243.9 | 280 × 280 | |
| Matrix | 448 × 448 | 384 × 384 | 192 × 192 |  | 256 × 256 |  | 256 × 256 | 256 × 256 | |
| Flip angle | - | - | - |  | 80 degrees |  | 20 degrees | 180 degrees | |
| Other Key Parameters | - | - | b-values = 0, 800 s/mm2 |  | Contrast Agent: Gadobenate Dimeglumine, 0.2 mL/kg, Flow Rate 2.5 mL/s |  | NEX: 1 | Echo Train Length: 6 | NEX: 1 |
| Scan Time | - | - | - |  | 5 min |  | 2 min 18 s | 5 min 32 s | |

Abbreviation: MRI, Magnetic resonance imaging; qMRI, Quantitative MRI; DCE-MRI, Dynamic contrast-enhanced MRI; T1WI, T1-Weighted Imaging; T2WI, T2-Weighted Imaging; DWI, Diffusion-Weighted Imaging; NEX, Number of Excitations; FOV, Field of view.

**Table S2.** Results of multicollinearity analysis for 10 significant qMRI variables.

| **Variable** | **VIF** |
| --- | --- |
| △T1 mapping local | 143.73 |
| △T local | 117.491 |
| △T tumor | 62.257 |
| △T1 mapping tumor | 60.673 |
| T1 mapping local | 49.062 |
| T1 mapping tumor | 27.392 |
| ADCtumor | 3.855 |
| ADClocal | 3.753 |
| T2 mapping local | 3.103 |
| T2 mapping tumor | 2.938 |

Abbreviation: qMRI, Quantitative magnetic resonance imaging; VIF, Variance inflation factor; ADC, Apparent diffusion coefficient.

**Table S3.** Importance ranking of radiomics features selected by LASSO regression analysis.

| **Image type** | **Feature Class** | **Features** | **Weight Importance** | |
| --- | --- | --- | --- | --- |
| **XG Boost** | **Random Forest** |
| wavelet-LLL | GLCM | Cluster shade | **0.234** | **0.078** |
| wavelet-LHH | GLDM | Dependence entropy | **0.098** | **0.110** |
| wavelet-HLH | FO | Kurtosis | **0.070** | **0.069** |
| wavelet-LLL | FO | 90 Percentile | **0.070** | **0.077** |
| wavelet-HLH | GLSZM | Small area low gray level emphasis | **0.068** | **0.048** |
| wavelet-HHH | GLRLM | Low gray level run emphasis | **0.064** | **0.099** |
| wavelet-HHH | GLSZM | Small area emphasis | **0.063** | **0.087** |
| wavelet-HLL | NGTDM | Strength | **0.050** | **0.064** |
| wavelet-HHH | GLSZM | Gray level variance | **0.047** | **0.059** |
| wavelet-LLH | GLSZM | Size zone nonuniformity normalized | **0.043** | 0.029 |
| wavelet-HHL | GLSZM | Large area high gray level emphasis | 0.039 | 0.029 |
| wavelet-HHH | GLSZM | Small area low gray level emphasis | 0.032 | 0.035 |
| wavelet-LHL | FO | Mean | 0.028 | 0.034 |
| wavelet-LLL | FO | Skewness | 0.026 | **0.055** |
| wavelet-LLL | FO | 10 Percentile | 0.025 | 0.044 |
| wavelet-HLH | GLCM | Sum entropy | 0.023 | 0.036 |
| wavelet-HHH | GLSZM | Gray level nonuniformity | 0.020 | 0.046 |

Note: Bolded variables represent the top ten by importance ranking.

Abbreviation: FO, First-order; GLCM, Gray level co-occurrence matrix; GLDM, Gray level dependence matrix; GLRLM, Gray level run length matrix; GLSZM, Gray level size zone matrix; NGTDM, Neighboring gray tone difference matrix.
